# Supplementary material for: Toward Mass Spectrometry Imaging in the Metabolomics Scale: Increasing Metabolic Coverage Through Multiple On-Tissue Chemical Modifications
Source: Front Plant Sci. 2019 Jul 12;10:860. doi: 10.3389/fpls.2019.00860 (PMC6639774; doi:10.3389/fpls.2019.00860)
Supplement: Supplementary file 1 [file Table_1.XLSX]

## Sheet: Tentatively Assigned Compounds
Table S1A. List of compounds uniquely detected with chmical dertivatization and tentatively assigned from the matching with database.
[M+Der]+ or [M+Der+K]+	Tentative Assignment	Chemical Composition	M	Derivatization Agent
158.129	**pyruvic acid	C2H4O	44.0262	GT	* Mass difference due to the derivatization is 160.052, 90.058, and 114.103 Da with CA, 2-PA, and GT, respectively.
170.129	acrolein	C3H4O	56.0262	GT	* GT derivatized compounds are detected as [M+Der]+ and 2-PA or CA derivatized compounds are listed for [M+Der+K]+
172.144	propanal	C3H6O	58.0419	GT	** Chemical composition is acetaldehyde but assigned as pyruvic acdi. See text.
174.124	glycolaldehyde	C2H4O2	60.0211	GT
184.145	butenal	C4H6O	70.0419	GT
186.16	isobutanal	C4H8O	72.0575	GT
188.103	glyoxylic acid	C2H2O3	74.0004	GT
188.139	lactaldehyde	C3H6O2	74.0368	GT
198.16	pentenal	C5H8O	84.0575	GT
200.176	pentanone	C5H10O	86.0732	GT
212.176	hexenal	C6H10O	98.0732	GT
214.155	methyl hydroxybutenal	C5H8O2	100.052	GT
214.191	hexanal	C6H12O	100.089	GT
216.134	diacetic acid	C4H6O3	102.032	GT
220.144	benzaldehyde	C7H6O	106.042	GT
228.207	heptanal	C7H14O	114.104	GT
230.15	methyloxobutanoate	C5H8O3	116.047	GT
236.139	salicylaldehyde	C7H6O2	122.037	GT
240.207	sulcatone	C8H14O	126.104	GT
242.223	octanal	C8H16O	128.12	GT
246.16	cinnamaldehyde	C9H8O	132.058	GT
250.155	(hydroxyphenyl)acetaldehyde	C8H8O2	136.052	GT
252.207	nonadienal	C9H14O	138.104	GT
254.185	histidinal	C6H10N3O	140.082	GT
254.222	nonenal	C9H16O	140.12	GT
260.124	oxoglutaric acid	C5H6O5	146.022	GT
262.155	coumaraldehyde	C9H8O2	148.052	GT
264.155	aldehydoarabinose	C5H10O5	150.053	GT
264.171	methyloctatrienedial	C9H10O2	150.068	GT
266.222	geranial	C10H16O	152.12	GT
274.047	glycine	C2H5NO2	75.0315	CA
276.155	dehydro-deoxy-rhamnonate	C6H10O5	162.053	GT
278.171	aldehydo fucose	C6H12O5	164.068	GT
281.161	pyridoxal	C8H9NO3	167.058	GT
282.217	oxogeraniol	C10H16O2	168.115	GT
284.124	didehydroshikimate	C7H6O5	170.022	GT
284.27	undecanone	C11H22O	170.167	GT
286.213	oxo-nonanoatic acid	C9H16O3	172.109	GT
288.063	alanine	C3H7NO2	89.0471	CA
288.119	dehydro-ascorbate	C6H6O6	174.016	GT
292.15	deoxy-glucuronate	C6H10O6	178.048	GT
292.202	pyrethrolone	C11H14O2	178.099	GT
294.145	hydroxybenzoyl-acetate	C9H8O4	180.042	GT
294.165	aldehydo-galactose	C6H12O6	180.063	GT
300.063	aminobutenoic acid	C4H7NO2	101.047	CA
301.168	decanoate	C10H20O2	172.146	2-PA
302.078	GABA	C4H9NO2	103.063	CA
304.058	serine	C3H7NO3	105.042	CA
306.13	dioxo-gulonate	C6H8O7	192.027	GT
306.254	ionone	C13H20O	192.151	GT
315.038	maleylpyruvate	C7H6O6	186.016	2-PA
316.094	valine	C5H11NO2	117.078	CA
317.079	acetyl glotamate	C7H10NO5	188.055	2-PA
318.073	threonine	C4H9NO3	119.058	CA
319.033	oxalosuccinate	C6H6O7	190.011	2-PA
320.035	cysteine	C3H7NO2S	121.019	CA
321.052	dihydroxy-oxohexanedioate	C6H8O7	192.027	2-PA
322.176	sinapaldehyde	C11H12O4	208.074	GT
322.249	hydroxy-ionone	C13H20O2	208.146	GT
324.171	benzil	C14H10O2	210.068	GT
324.192	phlorisovalerophenone	C11H14O4	210.089	GT
324.228	jasmonate	C12H18O3	210.126	GT
326.186	traumatin or benzoin	C14H12O2	212.084	GT
326.244	oxo-dodecenoate	C12H20O3	212.141	GT
328.259	oxo-dodecanoate	C12H22O3	214.157	GT
330.11	isoleucine/leucine	C6H13NO2	131.094	CA
330.218	dimethyldodecapentaenedial	C14H16O2	216.115	GT
331.068	asparagine	C4H8N2O3	132.053	CA
332.053	aspartic acid	C4H7NO4	133.037	CA
332.27	solavetivone	C15H22O	218.167	GT
334.285	farnesal	C15H24O	220.183	GT
338.207	tetraketide pyrone	C12H16O4	224.105	GT
338.244	grasshopper ketone or epoxyhydroxyapocarotenone	C13H20O3	224.141	GT
340.033	phosphoethanolamine	C2H8NO4P	141.019	CA
340.332	pentadecanone	C15H30O	226.23	GT
345.084	glutamine	C5H10N2O3	146.069	CA
345.121	Glutamic acid	C5H8NO4	146.105	CA
348.065	Methionine	C5H11NO2S	149.051	CA
354.051	aminopropanol phosphate	C3H10NO4P	354.051	CA
354.085	histidine	C6H9N3O2	354.085	CA
354.348	palmitaldehyde	C16H32O	240.245	GT
356.291	oxo-myristate	C14H26O3	242.188	GT
362.244	abscisic aldehyde	C15H20O3	248.141	GT
364.094	phenylaline	C9H11NO2	364.094	CA
369.085	succinyl-hydroxycyclohexadienecarboxylate	C11H12O6	240.063	2-PA
374.132	hexulose 6-phosphate	C6H13O9P	260.03	GT
374.244	coumaroylhexanoylmethane	C16H20O3	260.141	GT
380.089	tyrosine	C9H11NO3	181.073	CA
384.322	oxo-palmitate	C16H30O3	270.219	GT
385.262	palmitate	C16H32O2	256.24	2-PA
398.317	retinal	C20H28O	284.214	GT
398.374	stearate	C18H36O2	284.272	GT
400.15	kaempferol	C15H10O6	286.048	GT
400.332	abieta-dieneal	C20H30O	286.23	GT
403.105	tryptophan	C11H12N2O2	204.089	CA
406.306	oxo-phytodienoate	C18H28O3	292.204	GT
407.246	linolenate	C18H30O2	278.225	2-PA
408.322	oxo-(pentenyl)-cyclopentaneoctanoate	C18H30O3	294.219	GT
409.262	linoleate	C18H32O2	280.24	2-PA
410.338	oxo-oleate	C18H32O3	296.235	GT
411.277	oleate	C18H34O2	282.256	2-PA
413.293	stearate	C18H36O2	284.271	2-PA
414.312	oryzalexin C	C20H28O2	300.209	GT
416.182	trihydroxymethoxyisoflavanone	C16H14O6	302.079	GT
416.327	oryzalexin A or oryzalexin B	C20H30O2	302.225	GT
420.117	amidinoscylloinosamine	C7H15N3O5	221.101	CA
424.08	amino-deoxychorismate	C10H11NO5	225.063	CA
430.306	gibberellin A12 aldehyde	C20H28O3	316.204	GT
432.322	kauralexin A3	C20H30O3	318.219	GT
435.277	di-homo-linolenate	C20H34O2	306.256	2-PA
439.308	phytenate	C20H38O2	310.287	2-PA
441.324	arachidate	C20H40O2	312.303	2-PA
442.257	salutaridine	C19H22NO4	328.155	GT
442.306	pyrethrin I	C21H28O3	328.204	GT
444.322	hydroxyprogesterone	C21H30O3	330.219	GT
464.127	thiamine	C12H17N4OS	265.112	CA
466.328	prostaglandin E2	C20H32O5	352.225	GT
469.355	behenate	C22H44O2	340.334	2-PA
477.14	queuine	C12H16N5O3	278.125	CA
493.354	aurachin C	C25H33NO2	379.251	GT
495.371	tetracosenoate	C24H46O2	366.35	2-PA
496.353	epoxy-hydroxydihydroapocarotenal	C25H34O3	382.251	GT
496.426	cholestadienone	C27H42O	382.324	GT
498.127	hydroxy oxindole acetate glucoside	C16H19NO9	369.106	2-PA
509.349	aurachin C epoxide	C25H33NO3	395.246	GT
510.442	episterone	C28H44O	396.339	GT
517.087	acetylneuraminate phosphate	C11H19NO12P	388.064	2-PA
524.458	avenastenone	C29H46O	410.355	GT
528.452	hydroxycampestenone	C28H46O2	414.35	GT
538.473	cycloeucalenone	C30H48O	424.371	GT
540.452	formylergostadienol	C29H46O2	426.35	GT
542.468	hydroxymethylcholestenecarbaldehyde	C29H48O2	428.365	GT
554.468	oxolanosterol	C30H48O2	440.365	GT
570.463	hydroxyoxoamyrin	C30H48O3	456.36	GT
578.198	quercetin-glucoside	C21H20O12	464.095	GT
578.598	dotriacontanal	C32H64O	464.495	GT

## Sheet: 2-Picolylamine
Table S1B. Mass list uniquely found after derivatization with 2-PA.
m/z
259.019	* Tentatively Identified is in red
272.888	* Masses corresponding to other than potassium adduct is removed.
281.079
286.774
294.968
295.919
301.168
305.127
315.038
316.983
317
317.033
317.063
317.067
317.079
318.062
319.033
320.05
321.052
331.142
333.043
335.049
340.974
341.12
350.015
350.037
369.085
370.998
372.946
385.26
385.262
393.286
395.301
397.206
401.071
405.98
407.106
407.246
409.262
410.264
411.277
413.293
426.046
427.049
428.045
430.983
433.151
435.277
437.254
439.175
439.308
440.061
441.25
441.324
447.215
451.138
452.145
453.064
453.154
453.249
454.252
455.206
465.154
466.161
467.169
468.172
469.355
480.175
480.197
482.188
483.181
495.165
495.371
498.127
513.211
517.087
540.016
550.626
551.033
551.63
553.206
553.543
555.221
556.224
561.187
575.243
576.174
578.596
586.064
587.244
587.325
588.198
589.259
590.262
593.117
594.121
595.133
596.136
597.147
607.133
608.025
609.146
613.227
615.238
616.235
617.236
628.212
635.154
641.313
644.585
652.19
654.202
657.285
677.384
687.072
703.274
932.499

## Sheet: Coniferyl Aldehyde
Table S1C. Mass list uniquely found after derivatization with CA
m/z
256.997	* Tentatively Identified is in red
257.983	* Masses corresponding to other than potassium adduct is removed.
260.896
264.053
267.897
272.931
274.047
286.888
288.063
288.963
295.919
295.926
298.971
300.063
302.078
302.933
304.058
316.094
318.073
319.046
320.035
330.11
331.068
332.053
340.033
345.084
345.121
348.065
349.023
354.051
354.085
363.061
364.094
365.077
365.19
372.903
377.004
377.077
377.098
379.092
380.089
382.051
382.081
390.96
393.072
394.075
395.087
397.086
397.103
398.926
401.207
403.033
403.105
407.086
411.082
414.059
416.976
417.047
420.117
424.08
428.978
429.238
431.027
433.043
434.046
435.042
435.058
442.072
444.947
450.017
458.272
463.258
464.127
473.004
477.14
482.188
499.315
510.958
513.076
533.991
547.358
549.117
551.033
555.14
555.248
557.264
559.18
561.194
569.119
571.134
572.138
573.15
574.153
575.166
576.17
579.163
589.993
591.384
600.117
611.024
611.106
615.238
629.319
631.336
635.121
635.411
637.07
652.191
679.437
687.07
688.393
689.396
707.374
708.378
712.393
735.434
737.45
738.453
743.447
747.397
749.197
750.2
750.392
751.213
752.216
753.23
759.436
761.449
773.39
787.346
787.435
794.507
795.51
796.523
797.41
797.524
798.525
800.43
818.508
819.511
820.463
820.523
821.526
822.415
823.426
893.422
932.498
952.485
953.491
955.567
977.547

## Sheet: Girard's T
Table S1D. Mass list uniquely found after derivatization with GT
m/z
158.129	* Tentatively Identified is in red
160.107
166.085
170.129
171.136
172.144
174.124
182.068
184.145
186.16
186.827
188.103
188.139
195.148
197.164
198.088
198.16
200.176
208.143
210.122
212.174
212.176
214.155
214.191
216.134
219.148
220.144
221.146
221.163
222.159
222.987
224.174
228.207
230.15
231.18
231.188
232.183
234.159
236.139
236.174
237.158
237.178
238.19
240.121
240.207
242.223
243.225
246.16
250.092
250.155
252.207
253.209
254.101
254.16
254.185
254.222
255.104
255.224
256.237
257.24
260.124
262.155
262.19
263.161
263.217
264.155
264.171
266.148
266.222
268.175
268.2
270.216
270.252
271.219
271.255
272.195
274.19
276.155
276.169
276.205
278.171
278.185
279.143
280.147
280.164
281.161
282.179
282.217
282.227
284.124
284.171
284.243
284.27
286.19
286.211
286.213
287.193
287.214
288.119
288.205
290.185
290.221
292.15
292.2
292.202
292.236
294.145
294.165
294.181
294.216
295.138
296.168
298.19
298.211
298.284
299.218
299.287
300.226
302.185
303.241
304.164
304.2
304.225
306.13
306.179
306.241
306.254
307.138
307.225
308.18
308.206
308.268
309.154
310.157
310.174
314.185
314.242
316.146
316.2
316.221
318.179
318.216
318.252
319.236
321.138
321.252
322.176
322.249
324.171
324.192
324.228
324.237
325.069
325.24
326.152
326.186
326.244
326.253
328.259
329.195
330.218
332.12
332.195
332.27
333.252
334.137
334.253
334.285
335.214
336.237
338.207
338.244
339.245
340.257
340.332
343.236
345.094
345.251
346.211
347.11
348.262
349.16
349.246
350.278
351.262
352.257
354.236
354.348
356.252
356.291
358.221
360.299
361.246
362.244
363.104
363.262
364.258
366.273
372.656
374.132
374.244
374.314
374.653
379.17
379.257
381.185
381.295
382.304
382.377
383.38
384.322
385.323
392.288
394.34
395.31
398.317
398.374
400.15
400.332
402.345
403.348
404.299
406.306
408.322
409.246
409.323
409.351
410.338
410.408
411.339
413.354
414.312
416.182
416.327
418.304
418.34
419.174
419.222
420.32
421.323
422.299
422.335
423.339
424.26
424.314
426.269
427.333
428.345
430.179
430.306
432.322
434.335
435.283
436.314
437.318
437.347
438.243
438.33
439.334
440.355
442.257
442.306
444.322
450.333
452.309
453.341
454.325
455.329
463.373
466.328
467.331
468.352
469.323
470.335
470.407
471.338
472.342
472.362
473.365
474.378
478.251
480.352
481.355
482.334
482.366
486.33
488.708
490.336
490.705
492.352
492.703
493.354
494.282
494.357
495.36
496.353
496.426
498.33
498.366
500.367
508.347
509.349
510.363
510.442
511.367
512.368
524.342
524.458
525.346
525.458
528.363
528.452
531.436
532.439
538.473
539.401
539.425
540.452
541.428
542.441
542.468
545.393
551.426
552.43
554.391
554.468
567.42
570.463
578.198
578.598
580.466
581.47
582.384
588.378
589.381
598.476
600.502
604.466
605.469
606.533
608.487
609.491
622.369
622.476
623.372
644.44
644.498
646.378
662.373
662.453
667.561
668.565
676.487
676.549
677.49
678.448
690.444
702.443
703.482
704.459
705.462
714.444
718.477
721.485
722.489
726.443
728.459
729.462
730.462
731.509
742.476
744.491
745.488
756.586
759.559
760.55
763.532
764.535
768.49
769.493
784.58
787.532
788.536
796.593
797.596
803.562
808.56
827.566
833.615
844.636
889.674
890.677
913.673
914.676
922.582
978.749
984.758
